# Supplementary material
Source: PubMed Central journal article supplement (PMC6512278)
Supplement: jamaoncol-5-953-s002.pdf [file jamaoncol-5-953-s002.pdf]

1  
2  
3  
4

# Sun Yat-Sen University Cancer Center

## CLINICAL STUDY PROTOCOL

**Title:** Sorafenib combined with hepatic arterial infusion of oxaliplatin plus 5 fluorouracil/leucovorin versus sorafenib alone in hepatocellular carcinoma with portal vein tumor thrombosis: a multicenter, open-label, randomized controlled trial.

**Test Drug:** Sorafenib  
Oxaliplatin, leucovorin, 5-fluorouracil

**Funding:** National Key R&D Program of China (2017YFA0505803)  
National Natural Science Foundation of China Grants (81625017 and 81572385)  
Fundamental Research Funds for the Central Universities of China no. 16ykjc36

**Principal Investigator:** Ming Shi, MD, Professor

**Study Number/Version/Date:** S021 / Version 2.2 / 17 March 2016

**Development Phase:** Phase III

**ClinicalTrials.gov ID:** NCT02774187

**Confidentiality statement:** *The following confidential information is the property of Sun Yat-sen University Cancer Center. As long as the information contained in this protocol has not been published, it may only be used when permission has been obtained from Sun Yat-sen University Cancer Center. It is not permissible to make reproductions of all or sections of this protocol. Commercial use of the information is only possible with the permission of the proprietor and is subject to a license fee.*

|    |                                                                                          |    |
|----|------------------------------------------------------------------------------------------|----|
| 5  | <b>Table of Contents</b>                                                                 |    |
| 6  | 1. INTRODUCTION.....                                                                     | 5  |
| 7  | 1.1. Hepatocellular Carcinoma (HCC) .....                                                | 5  |
| 8  | 1.2. Sorafenib is the Standard Treatment for HCC with PVTT.....                          | 6  |
| 9  | 1.3 Hepatic Arterial Infusion Chemotherapy .....                                         | 7  |
| 10 | 1.4 Rationale for Synergistic Effects of Sorafenib and HAIC of FOLFOX.....               | 8  |
| 11 | 2. STUDY OBJECTIVES .....                                                                | 9  |
| 12 | 3. STUDY INSTITUTE AND INVESTIGATORS .....                                               | 10 |
| 13 | 4. INVESTIGATIONAL PLAN .....                                                            | 10 |
| 14 | 4.1. Study Design .....                                                                  | 10 |
| 15 | 4.1.1. Sorafenib plus HAIC of FOLFOX group (SoraHAIC group) (Figure 4-1).....            | 11 |
| 16 | 4.1.2. Sorafenib group (sorafenib group) (Figure 4-2) .....                              | 13 |
| 17 | 4.1.3. Description and rationale of design.....                                          | 14 |
| 18 | 4.1.4. Data Monitoring Committee (DMC).....                                              | 14 |
| 19 | 4.2. Selection of Study Population .....                                                 | 15 |
| 20 | 4.2.1. Primary diagnosis .....                                                           | 15 |
| 21 | 4.2.2. Number of patients .....                                                          | 15 |
| 22 | 4.2.3. Inclusion Criteria .....                                                          | 15 |
| 23 | 4.2.4. Exclusion Criteria.....                                                           | 17 |
| 24 | 4.3. Removal of Subjects from Study.....                                                 | 17 |
| 25 | 4.3.1. Criteria for protocol treatment (sorafenib) discontinuation.....                  | 18 |
| 26 | 4.3.2. Criteria for HAIC treatment discontinuation.....                                  | 19 |
| 27 | 4.4. Randomization and Stratification Factors .....                                      | 20 |
| 28 | 4.5. Mask .....                                                                          | 21 |
| 29 | 4.6. Criteria for Treatment Adjustment .....                                             | 21 |
| 30 | 4.6.1. Criteria for starting the cycle (for both groups).....                            | 21 |
| 31 | 4.6.2. Criteria for HAIC (FOLFOX) dose adjustment (dose interruption and reduction)..... | 21 |
| 32 | 4.6.3. Criteria for adjusting the sorafenib dose (dose interruption and reduction).....  | 22 |
| 33 | 4.6.4. Prior and Concomitant Therapy .....                                               | 25 |
| 34 | 4.6.5. Subsequent treatment.....                                                         | 26 |
| 35 | 4.7. Study Variables .....                                                               | 28 |
| 36 | 4.7.1. Primary endpoint .....                                                            | 28 |

|    |                                                                                     |    |
|----|-------------------------------------------------------------------------------------|----|
| 37 | 4.7.2. Secondary endpoints.....                                                     | 28 |
| 38 | 4.8. Parameters Assessed, Clinical Tests, and Assessment Schedule .....             | 30 |
| 39 | 4.8.1. Parameters Assessed Before Enrollment.....                                   | 30 |
| 40 | 4.8.2. Tests and Evaluations before Discontinuation of the Protocol Treatment ..... | 31 |
| 41 | 4.8.3. Tests and Evaluations after Discontinuation of the Protocol Treatment .....  | 31 |
| 42 | 4.8.4. Follow-up .....                                                              | 32 |
| 43 | 4.9. Data Quality and Documentation .....                                           | 32 |
| 44 | 5. ETHICAL CONSIDERATIONS .....                                                     | 33 |
| 45 | 5.1. Protection of Patients’ Rights.....                                            | 33 |
| 46 | 5.2. Informed Consent .....                                                         | 33 |
| 47 | 5.2.1. Informed consent discussion .....                                            | 33 |
| 48 | 5.2.2. Informed consent .....                                                       | 36 |
| 49 | 5.3. Protection of Personal Information and Identification of Patients .....        | 36 |
| 50 | 5.4. Adherence to the Protocol .....                                                | 37 |
| 51 | 5.5. Conflicts of Interest .....                                                    | 37 |
| 52 | 5.6. Funding.....                                                                   | 37 |
| 53 | 5.7. Approval by Institutional Review Boards or Ethics Committees.....              | 37 |
| 54 | 6. STATISTICAL METHODS AND DETERMINATION OF SAMPLE SIZE .....                       | 38 |
| 55 | 6.1. Sample Size .....                                                              | 38 |
| 56 | 6.2. Enrollment Period and Follow-up Period.....                                    | 38 |
| 57 | 6.3. Intent-to-treat (ITT).....                                                     | 38 |
| 58 | 6.4. Interim analyses.....                                                          | 39 |
| 59 | 7. ADVERSE EVENTS .....                                                             | 39 |
| 60 | 7.1. Definition of Adverse Events .....                                             | 39 |
| 61 | 7.2. Assessment of Adverse Events.....                                              | 39 |
| 62 | 7.3. Causal Relationship of AE .....                                                | 40 |
| 63 | 7.3.1. Definitely related .....                                                     | 40 |
| 64 | 7.3.2. Probably related.....                                                        | 41 |
| 65 | 7.3.3. Possibly related.....                                                        | 41 |
| 66 | 7.3.4. Probably not related.....                                                    | 41 |
| 67 | 7.3.5. Definitely not related.....                                                  | 42 |
| 68 | 7.3.6. Unknown .....                                                                | 42 |

|    |                                                                                 |    |
|----|---------------------------------------------------------------------------------|----|
| 69 | 7.4. Intensity of AE .....                                                      | 42 |
| 70 | 7.5. Severe Adverse Events (SAEs) .....                                         | 43 |
| 71 | 8. DATA COLLECTION .....                                                        | 44 |
| 72 | 8.1. Types of Case Report Forms (CRFs) and Submission Deadlines .....           | 44 |
| 73 | 8.2. Submission of Imaging Data .....                                           | 45 |
| 74 | 8.3. Where to Direct Inquiries .....                                            | 46 |
| 75 | 8.4. Data Management.....                                                       | 46 |
| 76 | 9. APPENDICES .....                                                             | 47 |
| 77 | 9.1. Tumor Assessment .....                                                     | 47 |
| 78 | 9.2. Definitions of Eastern Cooperative Oncology Group Performance Status ..... | 49 |
| 79 | 9.3. Child–Pugh Score* .....                                                    | 50 |
| 80 | 9.4. BCLC Staging System.....                                                   | 51 |
| 81 | 9.5. Functional Assessment of Cancer Therapy–Hepatobiliary Symptom Index 8      |    |
| 82 | questionnaire .....                                                             | 51 |
| 83 | 9.6. Degree of Portal Vein Tumor Thrombus.....                                  | 52 |
| 84 | 10. REFERENCES .....                                                            | 53 |
| 85 |                                                                                 |    |

86 **1. INTRODUCTION**

87 **1.1. Hepatocellular Carcinoma (HCC)**

88 Globally, liver cancer ranked fourth for cancer deaths in 2015, and approximately  
89 90% of these are hepatocellular carcinoma (HCC)<sup>1</sup>. China alone accounts for 55% of  
90 global HCC incidence, and HCC is the second leading cause of cancer death in China<sup>2</sup>.  
91 Unlike in the United States and Europe, where HCC is associated with chronic  
92 hepatitis caused by persistent infection with hepatitis C virus (HCV), the etiology of  
93 HCC in China is hepatitis B virus (HBV)<sup>3</sup>.

94 A variety of treatments including surgical resection, local ablation therapy (e.g.,  
95 percutaneous ethanol injection therapy and percutaneous radiofrequency),  
96 transcatheter arterial chemoembolization, chemotherapy, and liver transplantation are  
97 performed for HCC. Surgical resection and local ablation therapy are considered  
98 curative treatments for localized lesions, and transcatheter arterial chemoembolization  
99 has also produced good outcomes. Surgical resection leads to 60–70% 5-year survival  
100 for patients with HCC who present with solitary tumors and have excellent liver  
101 function. However, because most patients present with advanced disease or  
102 insufficient liver function, surgical resection is an option for less than 20% of  
103 patients<sup>4</sup>. Portal vein tumor thrombus (PVTT) occurs in 13–32% of HCC patients at  
104 the time of diagnosis and has a profound adverse effect on prognosis<sup>5,6</sup>, so the  
105 subjects of this study are patients with HCC and PVTT who are not candidates for  
106 surgical resection, or local ablation therapy.

107 **1.2. Sorafenib is the Standard Treatment for HCC with PVTT**

108 HCC with PVTT has a median survival of 2.7–4.0 months if left untreated<sup>7,8</sup>.  
109 Sorafenib is the current standard of care for advanced HCC<sup>9,10</sup>. Sorafenib is a  
110 multikinase inhibitor that inhibits various kinases, including Raf kinases, and vascular  
111 endothelial growth factor receptors. Specifically, it inhibits serine/threonine kinases in  
112 the Raf family as well as vascular endothelial growth factor receptors (VEGFR-2 and  
113 3), platelet-derived growth factor receptor (PDGFR- $\beta$ ), and receptor tyrosine kinases  
114 such as Flt-3, kit, and Ret<sup>11</sup>.

115 When the SHARP and AP study demonstrated that sorafenib improved the overall  
116 survival (OS) rate in patients with unresectable HCC<sup>12,13</sup>, sorafenib became the first  
117 oral drug approved to treat HCC. In the SHARP study, median OS was 10.7 months in  
118 the sorafenib group and 7.9 months in the placebo group, with a hazard ratio of 0.69  
119 ( $p < 0.001$ ). In the AP study, median OS was 6.5 months in the sorafenib group and 4.2  
120 months in the placebo group, with a hazard ratio of 0.68 ( $p = 0.014$ ). Sorafenib  
121 significantly prolonged OS in patients with HCC compared with the placebo group.  
122 Based on the above data, Nexavar® (sorafenib) was approved by the European  
123 Medicines Agency (EMA) on October 30, 2007, and by the United States Food and  
124 Drug Administration (FDA) on November 19, 2007. As of October 2008, it was in use  
125 in 67 countries. In China, the indications were expanded to include unresectable HCC  
126 on August 2009, and the drug is now considered the standard therapy for unresectable  
127 advanced HCC.

128 **1.3 Hepatic Arterial Infusion Chemotherapy**

129 For patients with HCC and PVTT treated with sorafenib monotherapy, outcome  
130 remains poor, with a median survival time of 5.5–7.2 months<sup>14-16</sup>. It would be  
131 desirable to develop new effective drugs and treatment methods for HCC.

132 In Japan and Korea, hepatic arterial infusion chemotherapy (HAIC) is selected for  
133 patients with advanced HCC who are not candidates for surgical resection, or local  
134 ablation therapy. HAIC provides direct chemotherapeutic agent delivery into the  
135 tumor feeding arteries and minimizes systemic toxicities through a first-pass effect in  
136 the liver<sup>17,18</sup>. However, the disease commonly begins to progress again even after the  
137 treatment shrinks the tumor, and the cancer recurs, or the tumor starts growing again.  
138 Thus, treatment is often repeated as long as liver function will allow.

139 Hepatic arterial infusion of a cisplatin-based regimen was first investigated as a  
140 combination therapy with sorafenib<sup>19,20</sup>. In one randomized clinical trial, sorafenib  
141 plus hepatic arterial infusion of cisplatin extended OS by 22% or 1.9 months  
142 compared with sorafenib alone (10.6 months vs 8.7 months; hazard ratio [HR] 0.60,  
143 95% CI 0.38–0.96; p=0.03)<sup>21</sup>. In another randomized trial, a combination of sorafenib  
144 and a hepatic arterial infusion of cisplatin and fluorouracil failed to demonstrate  
145 survival superiority over sorafenib alone<sup>22</sup>. In summary, there is no sufficient evidence  
146 of a survival benefit associated with the addition of hepatic arterial infusion of a  
147 cisplatin-based regimen to sorafenib, despite impressive higher tumor response rates  
148 (22–36%)<sup>21,22</sup>.

149 **1.4 Rationale for Synergistic Effects of Sorafenib and HAIC of FOLFOX**

150 Compared with cisplatin, oxaliplatin has distinct cytotoxic, immunological, and  
151 pharmacological properties.<sup>23-26</sup> First, oxaliplatin kills cancer cells by inducing  
152 ribosome biogenesis stress rather than by engaging a DNA damage response.<sup>23</sup>  
153 Second, immunogenic tumor cell death induced by oxaliplatin (but not cisplatin) can  
154 promote a permanent antitumor immune response.<sup>25,26</sup> Furthermore, there is a  
155 significant pharmacokinetic advantage to using oxaliplatin for HAIC compared with  
156 cisplatin.<sup>24</sup> In brief, oxaliplatin might be a better option than cisplatin for HAIC.

157 Oxaliplatin, fluorouracil, and leucovorin (FOLFOX) is a regimen first used in  
158 colorectal cancer with liver metastases and was reported to be effective both by  
159 systemic delivery and HAIC in clinical trials<sup>27,28</sup>. EACH study showed that the  
160 systemic FOLFOX regimen provided better outcomes than doxorubicin for advanced  
161 HCC<sup>29</sup>. A retrospective study also showed that HAIC of FOLFOX therapy may  
162 improve survival compared to sorafenib in patients with advanced HCC<sup>30</sup>. Our phase  
163 II study of sorafenib plus HAIC of FOLFOX demonstrated a safe toxicity profile and  
164 a 12-month survival rate of 52.7% in patients with HCC and major PVTT<sup>31</sup>.

165 Since sorafenib improves survival through disease stabilization and has been shown  
166 to exert a synergistic anticancer effect with chemotherapeutic agents in preclinical  
167 research,<sup>32-34</sup> sorafenib combined with HAIC might benefit patients with advanced  
168 HCC more than either treatment alone. Therefore, this study was designed to assess  
169 the additive effects of HAIC of FOLFOX on the current standard therapy of sorafenib  
170 monotherapy and to establish this new therapy as the standard therapy for this patient



171 population. It is the first randomized phase III trial to compare oral sorafenib plus  
172 hepatic arterial infusion of FOLFOX with sorafenib monotherapy in patients with  
173 unresectable HCC and portal vein tumor thrombosis.

174

## 175 2. STUDY OBJECTIVES

176 To investigate the superiority of combination therapy with sorafenib and hepatic  
177 arterial infusion of oxaliplatin, 5-fluorouracil and leucovorin over the standard  
178 treatment of sorafenib monotherapy in terms of the primary endpoint of prolongation  
179 of OS in patients with HCC and PVTT who are not candidates for surgical resection,  
180 or local ablation therapy.

181

182 Figure 2-1. Schematic of the study design

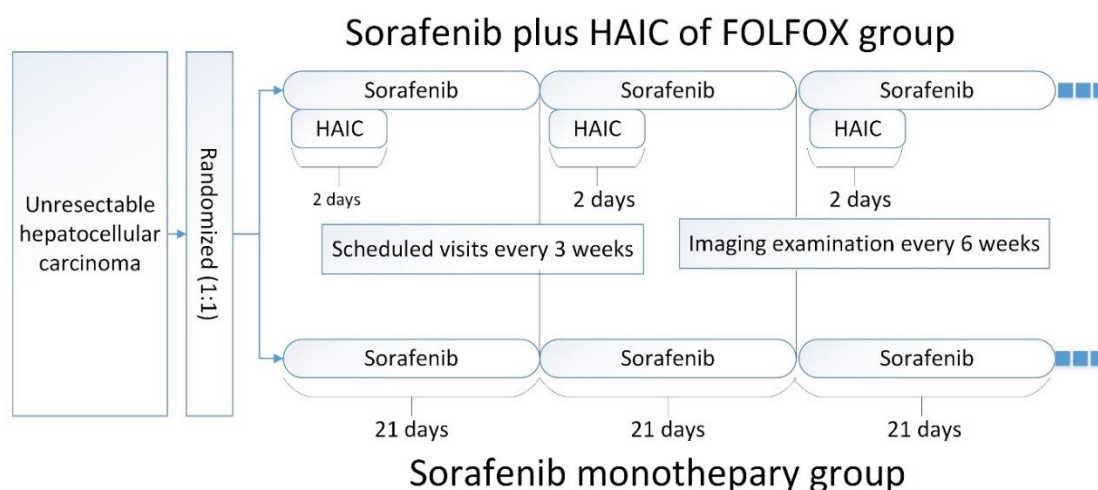

183

### 184 Primary endpoint

185 Overall survival (OS)

186 **Secondary endpoints**

187 Progression-free survival (PFS)

188 Objective response rate (ORR) by RECIST criteria

189 Safety

190

191 **3. STUDY INSTITUTE AND INVESTIGATORS**

---

| Study Institute                                            | Principal Investigators |
|------------------------------------------------------------|-------------------------|
| Sun Yat-sen University Cancer Center                       | Ming Shi                |
| First Affiliated Hospital of Sun Yat-sen University        | Guo-Sheng Tan           |
| Guangzhou No.12 People's Hospital                          | Yuan-Min Zhou           |
| Kaiping Central Hospital                                   | Wan-Qiang Fang          |
| The First Affiliated Hospital of University of South China | Xiao-Ping Wu            |

---

192 Coordinating/Principal Investigator for the study:

193 Name: Ming Shi

194 Address: Department of Hepatobiliary Oncology, Sun Yat-sen University  
195 Cancer Center, 651 Dongfeng East Road, Guangzhou, China

196 Telephone: (8620)-87343938 Fax: (8620)-87343938

197 Email: [shiming@sysu.edu.cn](mailto:shiming@sysu.edu.cn)

198 **4. INVESTIGATIONAL PLAN**

199 **4.1. Study Design**

200 This is a multicenter, prospective, randomized, open-label, multicenter,

201 parallel-group trial to verify the superiority of combination therapy with sorafenib and  
202 HAIC of oxaliplatin, 5-fluorouracil and leucovorin compared with sorafenib  
203 monotherapy in patients with HCC and PVTT who are not candidates for surgical  
204 resection, or local ablation therapy.

205 **4.1.1. Sorafenib plus HAIC of FOLFOX group (SoraHAIC group) (Figure 4-1)**

206 This study will use the following doses demonstrated as safe in our II study of  
207 sorafenib plus HAIC of FOLFOX for HCC with major portal vein thrombosis. The  
208 following regimen will be administered via the hepatic artery: oxaliplatin 85 mg/m<sup>2</sup>  
209 from hours 0 to 2 on day 1; leucovorin 400 mg/m<sup>2</sup> from hours 2 to 3 on day 1; and  
210 5-fluorouracil 400 mg/m<sup>2</sup> bolus at hour 3 and then 2400 mg/m<sup>2</sup> over 46 hours on  
211 days 1 and 2. Sorafenib will be administered continuously at a dose of 400 mg twice  
212 daily for 21 days from day 1 to day 21. This 3-week period constitutes one cycle, and  
213 cycles will be repeated until discontinuation of the protocol treatment.

214 Patients will be allowed to have sorafenib as a single agent and still be considered  
215 on study when HAIC is delayed or discontinued in the absence of disease progression.  
216 Earlier treatment with sorafenib will be allowed. This combination therapy will be  
217 repeated until progressive disease (PD) according to the RECIST criteria is  
218 documented.

219 If an adverse event is observed, treatment will be interrupted or the dose will be  
220 reduced as appropriate in accordance with **Section 4.7.3. Criteria for adjusting the**  
221 **sorafenib dose (dose interruption and reduction)** and **Section 4.7.2. Criteria for**

222 **HAIC (FOLFOX) dose adjustment (dose interruption and reduction).** After the  
223 protocol treatment is discontinued, appropriate treatment as described in **Section 4.7.5.**  
224 **Subsequent treatment** will be instituted.

225 A 3.5 French catheter will be inserted into the celiac trunk or superior mesenteric  
226 artery for arteriography. Depending on the arterial supply of the tumor identified by  
227 arteriography, coil embolization of the gastroduodenal artery and the right gastric  
228 artery will be performed routinely. Then, a 2.7 French microcatheter will be  
229 superselectively placed into the feeding arteries of the tumor and the tumor thrombus.  
230 If the tumors simultaneously accept blood supply from the celiac trunk and superior  
231 mesenteric artery, the microcatheter will be placed into the largest tumor feeding  
232 arteries. The peripheral end of the micro-catheter will be locked with a heparin lock  
233 (10 ml, 10,000 units, 1: 1,000 dilution) to prevent clotting of the catheter. The  
234 peripheral part of the catheter exposed outside the body will be covered with medical  
235 sterile gauze and fastened on the skin of the thigh using medical rubberized fabric and  
236 a bandage. Then, the patient will be transferred to the ward and confined to bed for 48  
237 hours. After confirming the location of the tips of the microcatheter by bedside X-ray  
238 radiography, the microcatheter will be connected to the artery infusion pump to  
239 administer the chemotherapy agent. After HAIC is completed, the catheter and sheath  
240 will be removed. The catheter will be placed again at the next treatment. The entire  
241 chemoembolization procedure will be performed under continuous fluoroscopic  
242 guidance with cone-beam computed tomography.

243

244 Figure 4-1. Treatment schedule (Sorafenib plus HAIC of FOLFOX group)

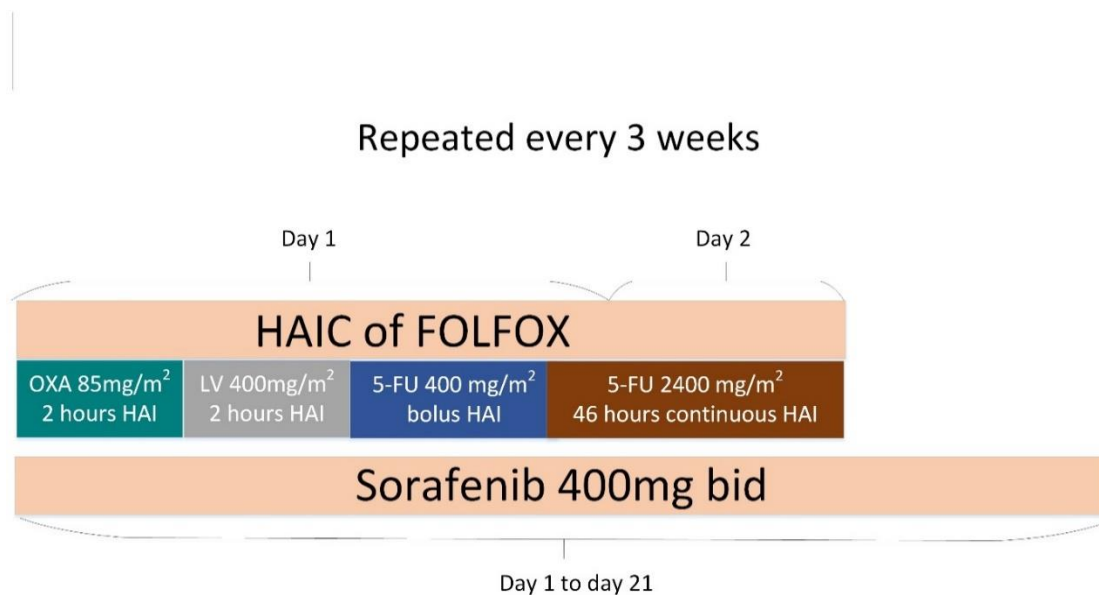

245

246 **4.1.2. Sorafenib group (sorafenib group) (Figure 4-2)**

247 Sorafenib will be administered continuously at a dose of 400 mg twice daily for 21  
 248 days from day 1 to day 21. This 3-week period constitutes one cycle, and cycles will  
 249 be repeated until discontinuation of the protocol treatment. Treatment will be repeated  
 250 until progressive disease (PD) is diagnosed by the RECIST criteria.

251 If an adverse event is observed during treatment with sorafenib, treatment will be  
 252 interrupted or the dose will be reduced as appropriate in accordance with **4.7.3.**

253 **Criteria for adjusting the sorafenib dose (dose interruption and reduction).** After  
 254 the protocol treatment is discontinued, appropriate treatment as described in **Section**  
 255 **4.7.5. Subsequent treatment** will be performed.

256

257 Figure 4-2. Treatment schedule (Sorafenib group)

Repeated every 3 weeks

Day 1 to day 21

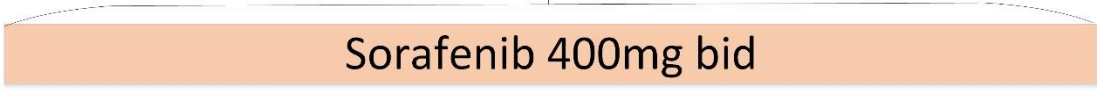

Sorafenib 400mg bid

258

259 **4.1.3. Description and rationale of design**

260 For patients with HCC and PVTT treated with sorafenib monotherapy, the  
261 prognosis remains poor. HAIC provides direct chemotherapeutic agent delivery into  
262 the tumor feeding arteries and minimizes systemic toxicities through a first-pass effect  
263 in the liver. Our phase II study of sorafenib plus HAIC of FOLFOX demonstrated a  
264 safe toxicity profile and a 12-month survival rate of 52.7% in patients with HCC and  
265 major PVTT. Because sorafenib is standard therapeutic modality for patients with  
266 advanced HCC, the control group is the sorafenib monotherapy and the experimental  
267 group is sorafenib plus HAIC of FOLFOX.

268 **4.1.4. Data Monitoring Committee (DMC)**

269 A Data Monitoring Committee (DMC) will be instituted for this study to ensure its  
270 ongoing safety. Recommendation for trial continuation will be guided by safety  
271 evaluations at all safety data reviews.

272 The committee will include an independent statistician and independent oncologists.  
273 Safety review meetings will be held as per a separate DMC charter, approximately  
274 every 6 months.

275 Decisions on trial termination, amendment or cessation of patient recruitment based

276 on safety or outcome findings will be made after recommendations from the DMC  
277 have been assessed by Sun Yat-sen University Cancer Center.

## 278 **4.2. Selection of Study Population**

### 279 **4.2.1. Primary diagnosis**

280 Patients with unresectable HCC and PVTT, ECOG PS 0, 1, or 2, Child-Pugh status  
281 A who have not received prior anticancer treatment for HCC.

### 282 **4.2.2. Number of patients**

283 The planned 244 patients with advanced, measurable HCC who fulfill the inclusion  
284 criteria and exclusion criteria will be randomized in a ratio of 1:1 to either sorafenib  
285 plus HAIC of FOLFOX or sorafenib. These 244 patients will be recruited from Sun  
286 Yat-sen University Cancer Center (80 patients), First Affiliated Hospital of Sun  
287 Yat-sen University (52 patients), Guangzhou No.12 People's Hospital (52 patients),  
288 Kaiping Central Hospital (30 patients) and The First Affiliated Hospital of University  
289 of South China (30 patients).

### 290 **4.2.3. Inclusion Criteria**

291 Patients who meet all of the following criteria in screening tests and observations  
292 within 21 days before enrollment will be included in the study.

- 293 1) 18 years or older
- 294 2) Diagnosis of HCC based on the diagnostic criteria for HCC used by the  
295 European Association for the Study of the Liver (EASL)

296 3) At least one tumor lesion that can be accurately measured according to  
297 the Response Evaluation Criteria in Solid Tumors version 1.1

298 4) HCC with PVTT

299 Patients who meet any of the following criteria are considered to have HCC  
300 with PVTT:

301 a) Biopsy-confirmed HCC. Ultrasound-guided percutaneous  
302 tumor biopsy is performed with a gauge needle.

303 b) HCC and PVTT confirmed by two image techniques,  
304 including contrast-enhanced ultrasound, dynamic  
305 contrast-enhanced computerized tomography and dynamic  
306 contrast-enhanced magnetic resonance imaging.

307 5) Eastern Cooperative Oncology Group performance status of 0 to 2

308 6) No previous treatment

309 7) No cirrhosis or cirrhotic status of Child-Pugh class A only

310 8) Not amenable to surgical resection, local ablative therapy and any  
311 other cured treatment.

312 9) The following laboratory parameters:

313 a) Platelet count  $\geq 75 \times 10^9$  per L

314 b) Hemoglobin  $\geq 8.5$  g/dL

315 c) Total bilirubin  $\leq 30$  mmol/L

316 d) Serum albumin  $\geq 30$  g/L

317 e) ASL and AST  $\leq 5$  x upper limit of normal



- 318 f) Serum creatinine  $\leq 1.5$  x upper limit of normal
- 319 g) INR  $\leq 1.5$  or PT/APTT within normal limits
- 320 h) white blood cell count  $\geq 3.0 \times 10^9$  per L
- 321 i) Absolute neutrophil count (ANC)  $> 1.5 \times 10^9$  per L
- 322 j) Left ventricular ejection  $\geq 45\%$
- 323 10) Provided written informed consent to participate in the study

#### 324 4.2.4. Exclusion Criteria

325 Patients who meet one of the following criteria in screening tests and observations  
326 within 21 days before enrollment will be excluded from the study:

- 327 1) Evidence of hepatic decompensation including ascites, gastrointestinal  
328 bleeding or hepatic encephalopathy
- 329 2) Known history of HIV or organ allograft
- 330 3) Known or suspected allergy to the investigational agents or any agent  
331 given in association with this trial
- 332 4) Patients with clinically significant gastrointestinal bleeding within 30  
333 days prior to study entry or evidence of bleeding diathesis
- 334 5) Known central nervous system tumors including metastatic brain  
335 disease
- 336 6) Patients who are pregnant or breastfeeding
- 337 7) Other invasive malignant diseases

#### 338 4.3. Removal of Subjects from Study

339 Sorafenib discontinuation is protocol treatment discontinuation in both groups. In  
340 the SoraHAIC group, patients will be allowed to have sorafenib as a single agent and

341 still be considered on study when HAIC is delayed or discontinued in the absence of  
342 disease progression.

343 Patients will continue therapy with the study medication until death or until a  
344 criterion is met for stopping therapy. After the protocol treatment is generally  
345 discontinued, continuation of HAIC, sorafenib or other treatments are allowed if the  
346 investigator determines that the patient is responding clinically to these treatments,  
347 but these treatments belong to subsequent therapy. Decisions about continuing the  
348 study medication will be made at the discretion of the investigator based on the  
349 investigator's judgment about the patient's clinical status.

350 The criteria for stopping protocol therapy (sorafenib) are outlined in **Section 4.3.1.**

351 The criteria for stopping HAIC treatment are outlined in **Section 4.3.2.**

#### 352 **4.3.1. Criteria for protocol treatment (sorafenib) discontinuation**

353 When one of the following situations occurs, sorafenib (protocol treatment) will be  
354 discontinued.

- 355 1) Tumor progression (both radiologic progression, as defined by RECIST<sup>35</sup>,  
356 and symptomatic progression, as defined by the Functional Assessment of  
357 Cancer Therapy–Hepatobiliary Symptom Index 8 questionnaire<sup>36</sup>)
- 358 2) Intolerable adverse event
  - 359 a) Patient cannot resume sorafenib after 30 days of interruption due  
360 to an adverse event
  - 361 b) An adverse event that meets the criteria for sorafenib dose

362 reduction occurs after the dose was already reduced to the lowest  
363 level

364 c) Life-threatening adverse event

365 3) The need for another anticancer treatment due to downstaging (such as  
366 surgery) at the physician's discretion

367 4) Patient requests to discontinue the study

368 5) Investigator determines that discontinuation is necessary for any reason

369 6) Deterioration of PS to ECOG 4

370 7) Death

371 The Investigator will make every reasonable effort to keep each patient on their  
372 randomized treatment unless it is in the patient's best interest to discontinue. If  
373 treatment is discontinued, every reasonable effort will be made to follow the patient to  
374 measure study outcomes.

375 After discontinuation/withdrawal from study drug treatment, patients must be  
376 entered in the follow-up period and contacted regularly (every 3 months) for survival  
377 status until death or study closure.

#### 378 **4.3.2. Criteria for HAIC treatment discontinuation**

379 HAIC treatment will be discontinued in the following situations occur.

380 1) Tumor progression (both radiologic progression, as defined by RECIST<sup>35</sup>,  
381 and symptomatic progression, as defined by the Functional Assessment of  
382 Cancer Therapy–Hepatobiliary Symptom Index 8 questionnaire<sup>36</sup>)

- 383           2) Intolerable adverse event
- 384                 a) Patient cannot resume HAIC after 30 days of interruption due to
- 385                 an adverse event
- 386                 b) An adverse event that meets the criteria for HAIC dose reduction
- 387                 occurs after the dose was already reduced to the lowest level
- 388                 c) Life-threatening adverse event
- 389           3) The need for another anticancer treatment due to downstaging (such as
- 390                 surgery) at the physician's discretion
- 391           4) HAIC becomes technically infeasible
- 392           5) Patient requests to discontinue the study
- 393           6) Investigator determines that discontinuation is necessary for any reason
- 394           7) Deterioration of PS to ECOG 4
- 395           8) Death

396   **4.4. Randomization and Stratification Factors**

397       Patients will be randomly assigned on a 1:1 basis to sorafenib 400 mg twice daily

398       or sorafenib 400 mg twice daily plus HAIC. To accomplish this, a

399       computer-generated randomization sequence will be created by an independent

400       organization. Randomization will be stratified by the following:

- 401           • Institution
- 402           • Degree of PVTT (Vp1-2, Vp3, Vp4)

403 **4.5. Mask**

404 As an open-label trial, all doctors, investigators and patients will know the assigned  
405 treatments.

406 **4.6. Criteria for Treatment Adjustment**

407 **4.6.1. Criteria for starting the cycle (for both groups)**

408 The next cycle will be started if the investigator confirms the following criteria are  
409 met within 1 week before the scheduled start date. If any of these criteria are not met,  
410 the cycle will be delayed until the criteria are met. If the criteria for starting the cycle  
411 are still not met for 30 days, the protocol treatment will be discontinued.

- 412 1) Neutrophil count  $\geq 1,200/\mu\text{L}$
- 413 2) Platelet count  $\geq 60,000/\mu\text{L}$
- 414 3) Total bilirubin  $\leq 30 \text{ mmol/L}$
- 415 4) Albumin  $\geq 3.0 \text{ mg/dL}$
- 416 5) Serum creatinine  $\leq 1.5$  times the institutional upper limit of normal

417 **4.6.2. Criteria for HAIC (FOLFOX) dose adjustment (dose interruption and**  
418 **reduction)**

419 If clinically significant hematological or nonhematological toxicity attributed to  
420 HAIC (FOLFOX) occurs, infusions alone will be interrupted. Sorafenib will be  
421 continued. The 5FU dose will be decreased to 300mg/m<sup>2</sup> bolus and 1800mg/m<sup>2</sup>/cycle  
422 continuous infusion in case of grade 3 or 4 diarrhea or stomatitis, skin toxicity or

423 other grade 3 major organ drug-related toxicity. The oxaliplatin dose will be decreased  
424 to 65 mg/m<sup>2</sup>/cycle in case of grade 3 or 4 neutropenia or thrombocytopenia, any other  
425 grade 3 major organ drug-related toxicity, or paresthesia associated with pain.

426 **4.6.3. Criteria for adjusting the sorafenib dose (dose interruption and reduction)**

427 The dose of sorafenib will be delayed or reduced for clinically significant hematologic  
428 and other toxicities that are related to sorafenib therapy. If a patient experiences  
429 several toxicities and there are conflicting recommendations, the recommended dose  
430 adjustment that reduces the dose to the lowest level will be used. When grading  
431 events, investigators will consider not only whether the patient received a certain  
432 treatment but also whether that treatment was indicated for the patient's condition.  
433 However, they will also consider whether it is possible to continue treatment with  
434 sorafenib by increasing the frequency of tests. All dose modifications will follow  
435 predefined dose levels:

- 436 1) Standard dose: 400 mg twice daily, two 200 mg tablets of sorafenib  
437 per dose twice daily (morning and evening)
- 438 2) Dose level 1: 400 mg once daily, two 200 mg tablets of sorafenib  
439 per dose once daily (morning)
- 440 3) Dose level 2: 400 mg every other day, two 200 mg tablets of  
441 sorafenib per dose once every other day (morning)

442 If the dose is reduced below level 2, the patient should be discontinued from the  
443 study. In addition, at the discretion of the investigator, the dose may be re-escalated to

444 400 mg po bid after the resolution of the adverse event. When the dose is increased, it  
 445 will be increased one level at a time.

446 The following tables (Table 4-1, Table 4-2 and Table 4-3) illustrate dose  
 447 modifications and delays:

448 Table 4-1. Sorafenib dose delay and modification guidelines for nondermatological toxicities

| Grade                                              | Dose delay            | Dose modification        |
|----------------------------------------------------|-----------------------|--------------------------|
| Hematologic toxicities                             |                       |                          |
| Grade 0–2                                          | Treat on time         | No change                |
| Grade 3                                            | Treat on time         | Decrease one dose level  |
| Grade 4                                            | Delay* until ≤grade 2 | Decrease one dose level  |
| Nonhematologic toxicities (except skin toxicity) † |                       |                          |
| Grade 0–2                                          | Treat on time         | No change                |
| Grade 3                                            | Delay* until ≤grade 2 | Decrease one dose level‡ |
| Grade 4                                            | Off protocol therapy  | Off protocol therapy     |

449 \* If no recovery after a 30-day delay, treatment will be discontinued unless the patient is deriving clinical benefit.

450 † Also excludes nausea/vomiting that has not been premedicated and diarrhea.

451 ‡ If more than two dose reductions are required, treatment will be discontinued.

452

453 Table 4-2. Sorafenib dose delay and modification guidelines for dermatological toxicities\*

| Grade   | During a course of therapy | Dose for next cycle |
|---------|----------------------------|---------------------|
| Grade 1 | Maintain dose level        | Maintain dose level |

## Phase III Trial Comparing Sorafenib Monotherapy with Sorafenib Plus HAIC of FOLFOX

|         |                |                                       |                       |
|---------|----------------|---------------------------------------|-----------------------|
| Grade 2 | 1st appearance | Interrupt until resolved to grade 0–1 | Maintain dose level   |
|         | 2nd appearance | Interrupt until resolved to grade 0–1 | 400 mg every day      |
|         | 3rd appearance | Interrupt until resolved to grade 0–1 | 400 mg every 2 days   |
|         | 4th appearance | Discontinue treatment permanently     |                       |
| Grade 3 | 1st appearance | Interrupt until resolved to grade 0–1 | 400 mg every day†     |
|         | 2nd appearance | Interrupt until resolved to grade 0–1 | 400 mg every two days |
|         | 3rd appearance | Discontinue treatment permanently     |                       |

454 \* Patients experiencing hand–foot skin reaction should have their signs and symptoms graded  
 455 according to table 3. Other skin toxicities will be graded according to CTCAE v4.0 Common Terminology Criteria  
 456 for Adverse Events version 4.0.

457 † For patients who require a dose reduction for grade 3 rash or hand–foot skin reaction, the dose of the study drug  
 458 may be increased to the starting dose after one full cycle of therapy has been administered at the reduced dose  
 459 without the appearance of rash or hand–foot skin reaction grade  $\geq 1$ .

460

461 Table 4-3. Grades for hand-and-foot skin reaction

| Grade   |                                                                                                                                                                                                |
|---------|------------------------------------------------------------------------------------------------------------------------------------------------------------------------------------------------|
| Grade 1 | numbness, dysesthesia/paresthesia, tingling, painless swelling or erythema of the hands and/or feet and/or discomfort that does not disrupt normal activities                                  |
| Grade 2 | painful erythema and swelling of the hands and/or feet and/or discomfort affecting the patient’s activities                                                                                    |
| Grade 3 | moist desquamation, ulceration, blistering or severe pain of the hands and/or feet and/or severe discomfort that causes the patient to be unable to work or perform activities of daily living |



462

463 Patients who develop rash/desquamation or hand-foot skin reaction during  
464 treatment with sorafenib should have the involved area photographed if possible.

465 Patients with discomfort due to hand-foot syndrome may be treated with topical  
466 emollients, low-potency topical steroids, or urea-containing cream.

467 For patients who require a dose reduction for grade 3 rash or hand-foot syndrome,  
468 the dose of the study drug may be increased to the starting dose after one full cycle of  
469 therapy has been administered with the reduced dose without the appearance of rash  
470 or hand foot syndrome  $\geq$  grade 1.

471 All other grade 3 toxicities related to the study drug will result in a permanent dose  
472 reduction.

#### 473 **4.6.4. Prior and Concomitant Therapy**

474 All medication (i.e., best supportive care) that is considered necessary for the  
475 patient's welfare and is not expected to interfere with the evaluation of the study drug  
476 may be given at the discretion of the Investigator. All concomitant medications  
477 (including start/stop dates, total daily dose and indication) must be recorded in the  
478 patient's source documentation, as well as in the appropriate pages of the CRF.

#### 479 **Permissible Concomitant Medication/Therapies**

480 The following concomitant treatments and supportive care may be provided if  
481 necessary.

482 1) Patients may receive nontargeted therapy for the primary disease (e.g.,

483 acupuncture) or eat foods fortified with vitamins/minerals if the investigator  
484 or investigator determines the treatment or food will not interfere with or  
485 influence the evaluation of the study results.

486 2) Palliative care or supportive care may be provided for the primary disease as  
487 long as prohibited drugs are not used.

488 3) All recruited patients with HBV-related HCC will receive preemptive  
489 antiviral therapy.

490 4) Symptomatic treatment drugs, such as analgesics, antiemetics

491 5) Drugs for hypertension, diabetes and other chronic diseases

492 **Nonpermissible Concomitant Medication/Therapies:**

493 Patients are forbidden to receive the following treatments during the protocol  
494 treatment period. After protocol treatment, patients are allowed to receive the  
495 following treatments.

496 1) Immunotherapy including programmed cell death protein-1 inhibitor  
497 treatment

498 2) Antitumor drugs treatments, such as radiotherapy, ablation, TACE, systemic  
499 chemotherapy and surgery

500 3) Other molecular targeted agents, such as regorafenib and lenvatinib

501 **4.6.5. Subsequent treatment**

502 Treatments for HCC not described in this protocol will not be performed until the  
503 criteria for discontinuation of the protocol treatment are met. Subsequent treatments

504 include HAIC, resection, ablation, sorafenib, systemic chemotherapy, immunotherapy,  
505 TACE, radiotherapy, regorafenib, lenvatinib and other treatments. The choice of the  
506 subsequent treatment will be determined according to the patient's request and the  
507 results of discussions by our multidisciplinary team after the protocol treatment is  
508 discontinued. For patients in whom all residual tumors can be safely removed by  
509 surgery or ablated by RF ablation, the corresponding treatment will be recommended.

510 The protocol treatment should generally be discontinued if the patient shows PD  
511 according to the RECIST criteria during the protocol treatment period. However,  
512 continuation of HAIC or sorafenib or both treatments is allowed if the investigator  
513 determines that the patient is clinically responding to the protocol treatment.  
514 Continuation of these treatments in this situation will also be considered subsequent  
515 treatment.

516 If the tumors are completely devascularized after HAIC, patients will receive  
517 sorafenib monotherapy and will be followed up by contrast CT/MRI every 6 weeks ( $\pm$   
518 1 week). HAIC will be repeated if new tumor enhancement is depicted on follow-up  
519 CT imaging. If the tumor progresses but still meets the eligibility criteria for HAIC,  
520 HAIC will be allowed. Continuation of these HAIC treatments in this situation will  
521 also be considered subsequent treatment.

522 Treatment crossover is permitted after the protocol treatment is discontinued during  
523 the initially assigned treatment.

524 **4.7. Study Variables**

525 **4.7.1. Primary endpoint**

526 **Overall survival (OS)**

527 The length of time from the date of randomization until death from any cause. The  
528 date survival was last confirmed will be used to censor surviving patients. In the  
529 absence of confirmation of death, the survival time will be censored at the last date  
530 the patient was known to be alive or at the cutoff date, whichever comes first.  
531 Unfollowable patients will be censored by the date survival was last confirmed before  
532 they became unfollowable.

533 **4.7.2. Secondary endpoints**

534 **Progression-free survival (PFS)**

535 The length of time from the date of randomization until progression of intrahepatic  
536 and extrahepatic lesions or death from any cause, whichever is sooner.

537 **Intrahepatic progression-free survival (ITPFS)**

538 The length of time from the date of randomization until progression of intrahepatic  
539 lesions or death from any cause, whichever is sooner.

540 **Tumor response**

541 The disease control rate (DCR) is defined as the rate of complete response (CR)  
542 plus partial response (PR) plus stable disease (SD). The objective response rate (ORR)  
543 is defined as the rate of CR plus PR. ORR and DCR will be determined using the  
544 RECIST criteria and modified RECIST criteria. Tumor response includes assessment

545 of target lesions, nontarget lesions and new lesions. All objective responses will be  
546 confirmed at least 4 weeks after the first observation.

547 **Intrahepatic response**

548 Intrahepatic ORR and DCR only including assessment of the change in tumor  
549 burden inside the liver will be also assessed by the RECIST and mRECIST criteria,  
550 respectively.

551 **OS by Vp**

552 OS will be compared by Vp stage.

553 **Safety**

554 Adverse events will be graded based on CTCAE v4.03. All observations pertinent  
555 to the safety of the study medication will be recorded on the CRF and included in the  
556 final report.

557 Safety variables are as follows: adverse events; laboratory changes (hematology  
558 and clinical chemistry); and changes in vital signs (blood pressure, heart rate,  
559 respiratory rate, and temperature), electrocardiogram (ECG) and, in some instances,  
560 chest X-ray.

561 All adverse events, whether considered treatment-related or not, will be reported on  
562 the CRF with diagnosis, start/stop dates, action taken, whether treatment was  
563 discontinued, any corrective measures taken, outcome and other possible causes. For  
564 all events, the relationship to the treatment and the severity of the event will be  
565 determined by the Investigator using the terms and definitions given in **Section 7**.

566 **4.8. Parameters Assessed, Clinical Tests, and Assessment Schedule**

567 **4.8.1. Parameters Assessed Before Enrollment**

568 Data on the following parameters will be collected within 3 weeks before  
569 enrollment for pre-enrollment evaluation.

- 570 1) Patient characteristics: Sex, height, pathological diagnosis, treatment history,  
571 disease stage (using the General Rules for the Clinical and Pathological  
572 Study of Primary Liver Cancer, see Section 21.3), ECOG-PS (see Section  
573 21.2), allergies, and concomitant diseases
- 574 2) Signs and symptoms and blood pressure
- 575 3) Body weight
- 576 4) Chest enhanced CT to evaluate potential lung metastasis
- 577 5) Electrocardiogram
- 578 6) Target lesion measurements (dynamic CT is preferred, but dynamic MRI is  
579 also acceptable)
- 580 7) Hematology parameters: hemoglobin, white blood cell count, neutrophil  
581 count, red blood cell count, platelet count
- 582 8) Blood biochemistry: AST, ALT, total bilirubin, direct bilirubin, ALP,  $\gamma$ -GTP,  
583 albumin, creatinine, Na, K, Cl, amylase, lipase, blood glucose
- 584 9) Urinalysis: urine protein, urine erythrocytes, urine leukocytes
- 585 10) Coagulation: PT (INR)
- 586 11) Ultrasound-guided percutaneous tumor biopsy
- 587 12) Tumor markers: AFP, PIVKA-II, CA199

588 13) Hepatitis virus: HBs antigen/HBs antibody/Hbc antibody, HCV antibody

589 **4.8.2. Tests and Evaluations before Discontinuation of the Protocol Treatment**

590 The following parameters will be collected every 3 weeks:

- 591 1) Signs and symptoms and blood pressure
- 592 2) Hematology parameters: hemoglobin, white blood cell count, neutrophil count,  
593 red blood cell count, platelet count
- 594 3) Blood biochemistry: AST, ALT, total bilirubin, direct bilirubin, ALP,  $\gamma$ -GTP,  
595 albumin, creatinine, Na, K, Cl, amylase, lipase, blood glucose
- 596 4) Urinalysis: urine protein, urine erythrocytes, urine leukocytes
- 597 5) Coagulation: PT (INR)
- 598 6) Tumor markers: AFP, PIVKA-II, CA199

599 Upper abdomen-enhanced CT (MRI is also acceptable) and chest-enhanced CT will  
600 be performed every 6 weeks ( $\pm$  1 week).

601 **4.8.3. Tests and Evaluations after Discontinuation of the Protocol Treatment**

602 When a patient is to be taken off treatment, the following assessment should be  
603 done within 30 days after study treatment has stopped:

- 604 1) Signs and symptoms and blood pressure
- 605 2) Hematology parameters: hemoglobin, white blood cell count, neutrophil count,  
606 red blood cell count, platelet count
- 607 3) Blood biochemistry: AST, ALT, total bilirubin, direct bilirubin, ALP,  $\gamma$ -GTP,  
608 albumin, creatinine, Na, K, Cl, amylase, lipase, blood glucose

- 609 4) Urinalysis: urine protein, urine erythrocytes, urine leukocytes
- 610 5) Coagulation: PT (INR)
- 611 6) Tumor markers: AFP, PIVKA-II, CA199
- 612 7) Upper abdomen-enhanced CT (MRI is also acceptable) and chest-enhanced CT

613 **4.8.4. Follow-up**

614 After study treatment ends, patients will be contacted every 3 months. The  
615 following items will be monitored to the greatest extent possible until the end of the  
616 entire study. Tests will be performed at the investigator's discretion depending on the  
617 patient's condition and will not be defined as part of this study.

- 618 1) Survival: Date survival was last confirmed or date of death; if dead, cause of  
619 death
- 620 2) Disease progression: Whether the disease has progressed, date of last follow-up  
621 regarding progression or date progression was confirmed, site of progression
- 622 3) Subsequent treatment: If the patient has received any diagnostic and  
623 therapeutic procedures or subsequent anti-tumoral/anti-cancer therapy, the  
624 name of the drug(s) in the first regimen following end of treatment should be  
625 collected.
- 626 4) Adverse event: AEs that were still ongoing at discontinuation of the protocol  
627 treatment should be followed up till resolution.

628 **4.9. Data Quality and Documentation**

629 Monitoring and auditing procedures defined/agreed by the primary Investigator will



630 be followed to comply with Good Clinical Practice (GCP) guidelines. Each center  
631 will be visited at regular intervals by a monitor to ensure compliance with the study  
632 protocol, GCP and legal aspects. This will include on-site checking of the CRFs for  
633 completeness and clarity, cross-checking with source documents, and clarification of  
634 administrative matters.

635 Entries made in the CRF must be either verifiable against source documents or  
636 have been directly entered into the CRF, in which case the entry in the CRF will be  
637 considered as the source data. The source data parameter to be verified and the  
638 identification of the source document must be documented. The study file and all  
639 source data should be retained until notification is given by the primary Investigator  
640 for destruction.

641

## 642 **5. ETHICAL CONSIDERATIONS**

### 643 **5.1. Protection of Patients' Rights**

644 All researchers involved in this study will conduct the study in accordance with the  
645 Declaration of Helsinki and the Ethical Guidelines of each participating institution for  
646 clinical studies.

### 647 **5.2. Informed Consent**

#### 648 **5.2.1. Informed consent discussion**

649 Prior to enrollment, investigators will give an Informed Consent Form approved by

650 the participating institution directly to the patient along with a thorough verbal  
651 explanation of the following items. In this protocol, “approval by the participating  
652 institution” means that the matter was reviewed by the advisory body of the institution  
653 (institutional review board or ethics committee) and a written letter of approval was  
654 sent to the applicant by the director of the participating institution or the chair of the  
655 reviewing committee.

- 656 1) Explanation of the diagnosis, stage, and expected prognosis
- 657 2) Notification that this study is a clinical trial  
658 The difference between a clinical trial and clinical practice
- 659 3) Study design and rationale (e.g., significance, number of enrolled  
660 patients, need for the study, objective, and treatment assignment)
- 661 4) Protocol treatments  
662 Drug names, routes of administration, dose, treatment schedule,  
663 duration of the entire protocol treatment, etc.
- 664 5) Anticipated effects of the protocol treatment  
665 Prolongation of survival, tumor shrinkage, symptom alleviation, etc.
- 666 6) Expected adverse events, complications, and sequelae and measures to  
667 be taken if they occur  
668 Explanation of the severity and incidence of expected adverse events  
669 (including complications, sequelae, and treatment-related death) and  
670 measures to be taken if an event occurs
- 671 7) Study-related costs and compensation

672 Explanation that the study will be similar to routine care in that  
673 treatment costs (both for the protocol treatment and treatment for any  
674 adverse events) will be covered by health insurance and compensation  
675 for illness or injury will be consistent with that awarded in normal  
676 clinical practice

677 8) Alternative treatments

678 Current typical treatments (including palliative care) and the  
679 procedures, effectiveness, and toxicity of standard therapies

680 Advantages and disadvantages of selecting alternative treatment

681 9) Potential benefits and potential risks

682 Explanation of potential benefits and risks of participating in the study

683 10) Direct access to medical history

684 Explanation that medical records may be reviewed, for example,  
685 healthcare providers from another institution may directly access  
686 medical history records and other such records with the permission of  
687 the institution's director to ensure accuracy

688 11) Declining to consent and withdrawal of consent

689 Explanation that patients are free to decline to participate in this study  
690 before participating and are also free to withdraw consent even after  
691 providing consent and that these decisions will not adversely impact  
692 their care

693 12) Protection of patients' rights

694 That the utmost efforts will be made to keep names and other personal  
695 information confidential

696 13) Freedom to ask questions

697 Written notification of the contact information of not only their  
698 assigned investigator but also the site investigator and the study chair  
699 (or study coordinator) and explanation that patients are free to ask  
700 questions about the study or treatment

### 701 **5.2.2. Informed consent**

702 A patient's participation in the study will be requested after they are given an  
703 explanation of the study, sufficient time to consider the decision, and their firm  
704 understanding of what the study entails has been confirmed. If the patient personally  
705 consents to participate in the study, the name of the doctor who conducted the  
706 informed consent discussion, the name of the patient giving informed consent, and the  
707 date of informed consent will be confirmed and recorded on the appended Informed  
708 Consent Form or an informed consent form in a format chosen by the study site.

709 The informed consent form will be copied two times. One copy will be given to the  
710 patient directly, and one copy will be retained by the site coordinator. The original  
711 will be stored with medical records.

### 712 **5.3. Protection of Personal Information and Identification of Patients**

713 To protect the privacy of individual patients, enrollment numbers issued on  
714 enrollment will be used to identify or refer to enrolled patients. All researchers will

715 make the utmost effort to protect personal information.

#### 716 **5.4. Adherence to the Protocol**

717 Researchers participating in this study will adhere to this protocol as long as it does  
718 not infringe on the safety or rights of patients.

#### 719 **5.5. Conflicts of Interest**

720 The researchers declare that they have no conflict of interest. The study has no  
721 commercial affiliations with any company.

#### 722 **5.6. Funding**

723 This work was supported by National Key R&D Program of China  
724 (2017YFA0505803), and the National Natural Science Foundation of China (No.  
725 81625017, No.81572385), and the Fundamental Research Funds for the Central  
726 Universities of China (No. 16ykjc36).

#### 727 **5.7. Approval by Institutional Review Boards or Ethics Committees**

728 Documented approval from appropriate ECs/IRBs will be obtained for all  
729 participating centers/countries according to GCP, local laws, regulations and  
730 organizations. When necessary, an extension, amendment or renewal of the EC  
731 approval must be obtained and forwarded to the primary investigator. The ECs must  
732 supply to the primary investigator, upon request, a list of the EC members involved in  
733 the vote and a statement to confirm that the EC is organized and operates according to

734 GCP and applicable laws and regulations.

735

## 736 **6. STATISTICAL METHODS AND DETERMINATION OF SAMPLE SIZE**

### 737 **6.1. Sample Size**

738 Planned number of patients: 244 patients (122 in each group)

739 The sample size is based on the assumptions that the median overall survival in  
740 patients receiving sorafenib monotherapy would be 6.5 months and that adding HAIC  
741 would improve median overall survival to 10 months. To detect this difference with a  
742 power of 80% and a one-sided  $\alpha$  of 0.05, we calculated that the required number of  
743 events would be observed if 218 patients were enrolled with an enrollment period of  
744 18 months and a follow-up period of 10 months. Based on an estimated dropout rate  
745 of 10%, target enrollment was set at 244 patients (122 per group).

### 746 **6.2. Enrollment Period and Follow-up Period**

747 Enrollment period: 18 months (from May 1, 2016, to November 1, 2017)

748 Follow-up period: 10 months

749 Overall study period: 28 months (from May 1, 2016, to September 1, 2018)

### 750 **6.3. Intent-to-treat (ITT)**

751 The ITT population includes all randomized patients, i.e., patients assigned to a  
752 treatment group by the randomization process, regardless of whether the patient

753 received any study treatment or received a different study treatment from which they  
754 were randomized.

#### 755 **6.4. Interim analyses**

756 There were no interim analyses in this study.

757

### 758 **7. ADVERSE EVENTS**

#### 759 **7.1. Definition of Adverse Events**

760 An adverse event (AE) is defined as any undesirable medical event that occurs in a  
761 patient receiving the study treatment (excluding worsening of the primary disease).  
762 These events may or may not have a clear causal relationship with the study treatment.  
763 Essentially, an adverse event is any undesirable or unintended sign (including  
764 abnormal laboratory test values), symptom, or condition that arises in a patient  
765 receiving the study treatment, regardless of whether the event has a causal  
766 relationship with the study treatment. In this study, adverse events that satisfy the  
767 above definition will be identified and recorded on case report forms.

#### 768 **7.2. Assessment of Adverse Events**

769 All AEs and severe adverse events (SAEs) occurring after initiation of clinical trial  
770 and until the end of follow-up/final visit should be recorded in the case report form  
771 (CRF). Investigators will look out for adverse events throughout the entire study

772 period. The following items must be recorded.

- 773 1) Date of occurrence
- 774 2) Grade (According to CTCAE v4.03)
- 775 3) Causal relationship of adverse event with each study drug (causality  
776 definitions from **7.3. Causal Relationship of AE**)
- 777 4) Assessment of the adverse event as serious or nonserious
- 778 5) Outcome of the adverse event (resolved/not resolved)

779 The principle investigator and subinvestigators must notify the IRB of all SAEs  
780 during the study regardless of causal relationship. They must fax or email the SAE  
781 form to the principal investigator and Asan Medical Center IRB within 24 hours of the  
782 investigator's acknowledgement of the event.

783 All information about SAEs should be reported to the principal investigator and  
784 IRB until they are completely resolved.

785

### 786 **7.3. Causal Relationship of AE**

787 The following categories and definitions of causal relationships to the study drug  
788 should be used for any AE:

#### 789 **7.3.1. Definitely related**

- 790 1) Event or laboratory test abnormality, with plausible temporal relationship to  
791 drug intake or intervention
- 792 2) Cannot be explained by the disease or other drugs



- 793           3) Response upon withdrawal of the study drug (pharmacologically,  
794           pathologically)
- 795           4) Event definitive pharmacologically or clinically (i.e., an objective and  
796           specific medical disorder or a recognized pharmacological phenomenon)

797   **7.3.2. Probably related**

- 798           1) Event or laboratory test abnormality with reasonable time relationship to  
799           drug intake or intervention
- 800           2) Unlikely to be attributed to the disease or other drugs
- 801           3) Response to withdrawal clinically reasonable

802   **7.3.3. Possibly related**

- 803           1) Event or laboratory test abnormality with reasonable time relationship to  
804           drug intake or intervention
- 805           2) Could also be explained by disease or other drugs
- 806           3) Response to withdrawal clinically reasonable

807   **7.3.4. Probably not related**

- 808           1) Event or laboratory test abnormality that could be explained by the disease or  
809           drugs others than the study drug intake or intervention
- 810           2) Response to withdrawal unsatisfactory or vague

811 **7.3.5. Definitely not related**

812 1) Event or laboratory test abnormality with a temporal relationship to drug  
813 intake or intervention unlikely

814 2) The disease or other drugs provide plausible explanations

815 **7.3.6. Unknown**

816 1) Cannot be judged because information is insufficient or contradictory

817 2) Data cannot be supplemented or verified

818

819 **7.4. Intensity of AE**

820 All AEs will be graded according to the Common Terminology Criteria of Adverse  
821 Event (CTCAE), version 4.03 grading scale.

822 Table 7-1. Grade refers to the severity of the AE.

---

| Grade | Description                                                                                              |
|-------|----------------------------------------------------------------------------------------------------------|
| 1     | Mild<br>Symptoms causing no or minimal interference with usual social & functional activities            |
| 2     | Moderate<br>Symptoms causing greater than minimal interference with usual social & functional activities |
| 3     | Severe<br>Symptoms causing inability to perform usual social & functional activities                     |
| 4     | Life-threatening<br>Symptoms causing inability to perform basic self-care functions or                   |

medical or operative intervention indicated to prevent permanent  
impairment, persistent disability

5            Death            Death

---

823

824    **7.5. Severe Adverse Events (SAEs)**

825        Events that meet the following criteria are defined as serious:

826            1) Death

827            2) Disability (dysfunction severe enough to interfere with ADL)

828            3) Life-threatening

829            4) Risk of disability

830            5) Requiring hospitalization or prolongation of existing hospitalization for  
831 treatment is indicated

832            6) Congenital anomaly or birth defect

833        Investigators will properly diagnose and treat events to minimize patient risks.

834        They will also perform appropriate diagnostic tests to collect evidence that clarifies  
835 the causality of serious adverse events.

836        **Life-threatening:** The term “life-threatening” in the definition of “serious” refers  
837 to an adverse event in which the subject was at risk of death at the time of the event. It  
838 does not refer to an adverse event that hypothetically might have caused death if it  
839 were more severe.

840        **Hospitalization:** Any adverse event leading to hospitalization or prolongation of

841 hospitalization will be considered as serious UNLESS at least one of the following  
842 exceptions are met:

- 843 1) The admission results in a hospital stay of less than 12 hours.
- 844 2) The admission is preplanned (i.e., elective or scheduled surgery arranged  
845 prior to the start of the study).
- 846 3) The admission is not associated with an adverse event (e.g., social  
847 hospitalization for purposes of respite care).

848 However, notably, invasive treatment during any hospitalization may fulfill the  
849 criteria of ‘medically important’ and as such may be reportable as an SAE dependent  
850 on clinical judgement. In addition, where local regulatory authorities specifically  
851 require a more stringent definition, the local regulation takes precedent.

852 **Disability:** A substantial disruption of a person’s ability to conduct normal life  
853 functions.

854

## 855 **8. DATA COLLECTION**

### 856 **8.1. Types of Case Report Forms (CRFs) and Submission Deadlines**

857 The types of CRFs used in this study and their submission deadlines are as follows.

- 858 1) Enrollment Eligibility Form: Fax to data center at enrollment
- 859 2) Patient Characteristics Report: Fax to data center within 2 weeks before the  
860 start of the study
- 861 3) Progress Report (each cycle): Fax to data center within 1 week after eligibility

- 862 to start next cycle is confirmed
- 863 4) SAE Report (Expedited Primary Report): Fax to study coordinator within 72
- 864 hours of SAE onset
- 865 5) SAE Report (Expedited Secondary Report): Fax to study coordinator within 7
- 866 days of learning of the event
- 867 6) Adverse Event Report (Normal Report): Fax to study coordinator within 15
- 868 days of learning of the event
- 869 7) Treatment Response Report: Fax to data center within 4 weeks after the end of
- 870 the protocol treatment
- 871 8) Treatment Completion Report: Fax to data center within 4 weeks after the end
- 872 of the protocol treatment
- 873 9) Follow-up Form: Fax to data center within 2 weeks after receiving a request\*
- 874 10) Treatment Suspension Report: Fax to the study chair when considering
- 875 discontinuation for a patient who does not clearly meet the specified criteria for
- 876 discontinuation of the protocol treatment
- 877 \*Will be requested every 4 months following the monitoring schedule of the data
- 878 center after the end of the study treatment.

879 **8.2. Submission of Imaging Data**

880 When submitting imaging data (CT or MRI) for interim analysis, each study site

881 will mask personal information (e.g., ID number, name, date of birth) on data from

882 enrollment and after discontinuation of the protocol treatment, write in the patient's

883 enrollment number for this study, and send the data to the study coordinator. DICOM  
884 data recorded on CD-R or DVD-R is generally preferred, but films are also acceptable.  
885 These should be submitted after discontinuation of the protocol treatment. Imaging  
886 data from enrollment will be collected for patients who did not start the protocol  
887 treatment.

### 888 **8.3. Where to Direct Inquiries**

- 889 1) Eligibility criteria, criteria for adjusting treatments, or imaging assessment,  
890 and inquiries requiring clinical judgment: Primary Investigator
- 891 2) Enrollment procedures or completion of CRFs: Data Center
- 892 3) Serious Adverse Event Reports: Primary Investigator

### 893 **8.4. Data Management**

894 Data sent to the data center will be anonymized in a linkable fashion at each study  
895 site. These data will be strictly managed in accordance with institutional standards.  
896 The data center will notify each participating institution of the serial numbers  
897 assigned to each enrolled patient. Data collected by the data center will be kept under  
898 strict control using these serial numbers.

899 When study results are presented at academic conferences or published in academic  
900 journals, measures will be taken to ensure study subjects cannot be identified. Patient  
901 data will be deleted if they withdraw their consent. However, results of analysis will  
902 not be deleted if study results have already been published.

903 If data from this study are used for secondary purposes, such as meta-analysis,

904 personal information will be kept strictly confidential, and measures will be taken to  
905 ensure study subjects cannot be identified.

906

## 907 **9. APPENDICES**

### 908 **9.1. Tumor Assessment**

909 Overall response, including assessment of the change in tumor burden inside and  
910 outside the liver, will be assessed by investigators by using the Response Evaluation  
911 Criteria in Solid Tumors (RECIST)<sup>37</sup>. Assessments will be made based on changes in  
912 the diameter of tumors that are observed by contrast CT or MRI until completion or  
913 discontinuation of the protocol treatment. The disease control rate (DCR) is defined as  
914 the rate of complete response (CR) plus partial response (PR) plus stable disease (SD).  
915 The objective response rate (ORR) is defined as the rate of CR plus PR. Tumor  
916 response includes assessment of target lesions, nontarget lesions and new lesions. All  
917 objective responses will be confirmed at least 4 weeks after the first observation.

918 In a post hoc analysis, the overall response will be assessed according to the  
919 modified RECIST (mRECIST) guidelines<sup>38</sup>. Assessments will be made based on  
920 changes in the diameter of surviving tumors deemed viable by contrast CT or MRI.  
921 Intrahepatic response, only including assessment of the change in tumor burden inside  
922 the liver, will be assessed by RECIST and mRECIST criteria, respectively.

923 Table 9-1. Assessment of Target Lesion Response: Conventional RECIST and mRECIST  
924 Assessment for HCC Following the AASLD-JNCI Guideline

| RECIST                                                                                                                                                                                 | mRECIST                                                                                                                                                                                                                      |
|----------------------------------------------------------------------------------------------------------------------------------------------------------------------------------------|------------------------------------------------------------------------------------------------------------------------------------------------------------------------------------------------------------------------------|
| CR=Disappearance of all target lesions                                                                                                                                                 | CR=Disappearance of any intratumoral arterial enhancement in all target lesions                                                                                                                                              |
| PR=At least a 30% decrease in the sum of diameters of target lesions, taking as reference the baseline sum of the diameters of target lesions                                          | PR=At least a 30% decrease in the sum of diameters of viable (enhancement in the arterial phase) target lesions, taking as reference the baseline sum of the diameters of target lesions                                     |
| SD=Any cases that do not qualify for either partial response or progressive disease                                                                                                    | SD=Any cases that do not qualify for either partial response or progressive disease                                                                                                                                          |
| PD=An increase of at least 20% in the sum of the diameters of target lesions, taking as reference the smallest sum of the diameters of target lesions recorded since treatment started | PD=An increase of at least 20% in the sum of the diameters of viable (enhancing) target lesions, taking as reference the smallest sum of the diameters of viable (enhancing) target lesions recorded since treatment started |

925 AASLD, American Association for the Study of Liver Diseases; JNCI, Journal of the National  
 926 Cancer Institute; HCC, hepatocellular carcinoma; mRECIST, modified Response Evaluation  
 927 Criteria in Solid Tumors; CR, complete response; PR, partial response; SD, stable disease; PD,  
 928 progressive disease.

929

930 Table 9-2. Overall Response Assessment in mRECIST: Responses for All Possible Combinations



931 of Tumor Responses in Target and Nontarget Lesions with or without the Appearance of New  
 932 Lesions

| Target Lesions | Nontarget Lesions | New Lesions | Overall Response |
|----------------|-------------------|-------------|------------------|
| CR             | CR                | No          | CR               |
| CR             | IR/SD             | No          | PR               |
| PR             | Non-PD            | No          | PR               |
| SD             | Non-PD            | No          | SD               |
| PD             | Any               | Yes or no   | PD               |
| Any            | PD                | Yes or no   | PD               |
| Any            | Any               | Yes         | PD               |

933 mRECIST, modified Response Evaluation Criteria in Solid Tumors; CR, complete response; PR,  
 934 partial response; IR, incomplete response; SD, stable disease; PD, progressive disease.

935 **9.2. Definitions of Eastern Cooperative Oncology Group Performance Status**

936 Table 9-3

| Grade | Performance Status                                                                                                                                        |
|-------|-----------------------------------------------------------------------------------------------------------------------------------------------------------|
| 0     | Fully active, able to carry on all predisease performance without restriction                                                                             |
| 1     | Restricted in physically strenuous activity but ambulatory and able to carry out work of a light or sedentary nature, e.g., light house work, office work |
| 2     | Ambulatory and capable of all selfcare but unable to carry out any work activities; up and about more than 50% of waking hours                            |
| 3     | Capable of only limited selfcare; confined to bed or chair more than 50% of waking                                                                        |

hours

4 Completely disabled; cannot carry on any selfcare; totally confined to bed or chair

5 Dead

937 **9.3. Child–Pugh Score\***

938 Copyright 1973, copyright British Journal of Surgery Society Ltd. Reproduced  
 939 with permission. Permission is granted by John Wiley & Sons Ltd on behalf of BJSS  
 940 Ltd.

941 Table 9-4

| Measure                                          | 1 point      | 2 points                             | 3 points                           |
|--------------------------------------------------|--------------|--------------------------------------|------------------------------------|
| <b>Total bilirubin, μmol/L (mg/dL)</b>           | <34 (<2)     | 34–50 (2–3)                          | >50 (>3)                           |
| <b>Serum albumin, g/dL</b>                       | >3.5         | 2.8–3.5                              | <2.8                               |
| <b>Prothrombin time, prolongation (s) or INR</b> | <4.0<br><1.7 | 4.0–6.0<br>1.7-2.3                   | > 6.0<br>>2.3                      |
| <b>Ascites</b>                                   | None         | Mild (or suppressed with medication) | Moderate to severe (or refractory) |
| <b>Hepatic encephalopathy†</b>                   | None         | Grade I–II                           | Grade III–IV                       |

942 \* Child–Pugh A: 5 or 6 points; Child–Pugh B: 7–9 points; Child–Pugh C: >9 points

943 †Grade of encephalopathy:

944 Grade 0: Lucid, normal personality, normal neurological test results, normal electroencephalogram

945 Grade 1: Restlessness, sleep disorder, irritability/agitation, tremors, dysgraphia, 5 cps waves

946 Grade 2: Lethargy, disorientation (temporal), inappropriateness, difficulty maintaining stable  
 947 posture, ataxia, slow triphasic waves

948 Grade 3: Somnolence, confused state, disorientation (spatial), hyperreflexia, rigidity, slow waves

949 Grade 4: Coma, no personality/unresponsive, cessation of cerebral activity, slow 2–3 cps delta  
 950 activity

951 **9.4. BCLC Staging System**

952 Copyright 2007, reproduced with permission from Elsevier

953 Table 9-5

|                       | Very early<br>stage (0) | Early stage<br>(A)         | Intermediate<br>stage (B) | Advanced<br>stage (C)         | Terminal<br>stage (D) |
|-----------------------|-------------------------|----------------------------|---------------------------|-------------------------------|-----------------------|
| Child–Pugh            | A                       | A-B                        | A-B                       | A-B                           | C                     |
| Performance<br>status | 0                       | 0                          | 0                         | 1-2                           | >2                    |
| Tumor                 | 1 HCC <2cm              | 1 HCC or 3<br>Nodules <3cm | Multinodular              | Portal<br>invasion,<br>N1, M1 | Any                   |
| Features              | Carcinoma<br>in situ    |                            |                           |                               |                       |

954 N1, lymph node metastasis. M1, extrahepatic spread.

955 **9.5. Functional Assessment of Cancer Therapy–Hepatobiliary Symptom Index 8**  
 956 **questionnaire**

957 Below is a list of statements that other people with your illness have said are  
 958 important. By circling one number per line, please indicate how true each statement

959 has been for you during the past 7 days.

960 Table 9-6

|             |                                                            | Not at | A little bit | Somewhat | Quite a bit | Very |
|-------------|------------------------------------------------------------|--------|--------------|----------|-------------|------|
|             |                                                            | all    |              |          |             | much |
| <b>GP1</b>  | I have a lack of energy                                    | 0      | 1            | 2        | 3           | 4    |
| <b>GP2</b>  | I have nausea                                              | 0      | 1            | 2        | 3           | 4    |
| <b>GP4</b>  | I have pain                                                | 0      | 1            | 2        | 3           | 4    |
| <b>C2</b>   | I am losing weight                                         | 0      | 1            | 2        | 3           | 4    |
| <b>CNS7</b> | I have pain in my back                                     | 0      | 1            | 2        | 3           | 4    |
| <b>HI7</b>  | I am fatigued                                              | 0      | 1            | 2        | 3           | 4    |
| <b>Hep2</b> | I am bothered by<br>jaundice or yellow<br>color to my skin | 0      | 1            | 2        | 3           | 4    |
| <b>Hep8</b> | I have discomfort or<br>pain in my stomach                 | 0      | 1            | 2        | 3           | 4    |

961 **9.6. Degree of Portal Vein Tumor Thrombus**

962 Table 9-7.

---

Grade

---

Vp1 Portal invasion at the 3rd or more peripheral portal branch

Vp2 Portal invasion at the 2nd portal branch

Vp3 Portal invasion at the 1st portal branch

Vp4 Portal invasion at the main portal branch

---

963 The degree of PVTT is according to Clinical Practice Guidelines proposed by the Liver Cancer  
964 Study Group of Japan<sup>39</sup>.

965

966 **10. REFERENCES**

- 967 1. Global Burden of Disease Cancer C, Fitzmaurice C, Allen C, et al: Global, Regional, and  
968 National Cancer Incidence, Mortality, Years of Life Lost, Years Lived With Disability, and  
969 Disability-Adjusted Life-years for 32 Cancer Groups, 1990 to 2015: A Systematic Analysis for the Global  
970 Burden of Disease Study. *JAMA Oncol* 3:524-548, 2017
- 971 2. Park JW, Chen M, Colombo M, et al: Global patterns of hepatocellular carcinoma  
972 management from diagnosis to death: the BRIDGE Study. *Liver Int* 35:2155-66, 2015
- 973 3. Yu MC, Yuan JM, Govindarajan S, et al: Epidemiology of hepatocellular carcinoma. *Can J*  
974 *Gastroenterol* 14:703-9, 2000
- 975 4. Hung H: Treatment modalities for hepatocellular carcinoma. *Curr Cancer Drug Targets*  
976 5:131-8, 2005
- 977 5. Chan SL, Johnson PJ, Mo F, et al: International validation of the Chinese university  
978 prognostic index for staging of hepatocellular carcinoma: a joint United Kingdom and Hong Kong study.  
979 *Chin J Cancer* 33:481-91, 2014
- 980 6. Ikai I, Kudo M, Aii S, et al: Report of the 18th follow-up survey of primary liver cancer in  
981 Japan. *Hepatology Research* 40:1043-1059, 2010
- 982 7. Llovet JM, Bustamante J, Castells A, et al: Natural history of untreated nonsurgical  
983 hepatocellular carcinoma: rationale for the design and evaluation of therapeutic trials. *Hepatology*  
984 29:62-7, 1999
- 985 8. Villa E, Moles A, Ferretti I, et al: Natural history of inoperable hepatocellular carcinoma:  
986 estrogen receptors' status in the tumor is the strongest prognostic factor for survival. *Hepatology*  
987 32:233-8, 2000
- 988 9. Bruix J, Sherman M: Management of hepatocellular carcinoma: an update. *Hepatology*  
989 53:1020-2, 2011
- 990 10. European Association For The Study Of The L, European Organisation For R, Treatment Of C:  
991 EASL-EORTC clinical practice guidelines: management of hepatocellular carcinoma. *J Hepatol*  
992 56:908-43, 2012
- 993 11. Wilhelm SM, Carter C, Tang L, et al: BAY 43-9006 exhibits broad spectrum oral antitumor  
994 activity and targets the RAF/MEK/ERK pathway and receptor tyrosine kinases involved in tumor  
995 progression and angiogenesis. *Cancer Res* 64:7099-109, 2004
- 996 12. Cheng AL, Kang YK, Chen Z, et al: Efficacy and safety of sorafenib in patients in the  
997 Asia-Pacific region with advanced hepatocellular carcinoma: a phase III randomised, double-blind,  
998 placebo-controlled trial. *Lancet Oncol* 10:25-34, 2009

- 999 13. Llovet JM, Ricci S, Mazzaferro V, et al: Sorafenib in advanced hepatocellular carcinoma. *N*  
1000 *Engl J Med* 359:378-90, 2008
- 1001 14. Song do S, Song MJ, Bae SH, et al: A comparative study between sorafenib and hepatic  
1002 arterial infusion chemotherapy for advanced hepatocellular carcinoma with portal vein tumor  
1003 thrombosis. *J Gastroenterol* 50:445-54, 2015
- 1004 15. Zhang Y, Fan W, Wang Y, et al: Sorafenib With and Without Transarterial Chemoembolization  
1005 for Advanced Hepatocellular Carcinoma With Main Portal Vein Tumor Thrombosis: A Retrospective  
1006 Analysis. *Oncologist* 20:1417-24, 2015
- 1007 16. Choi JH, Chung WJ, Bae SH, et al: Randomized, prospective, comparative study on the  
1008 effects and safety of sorafenib vs. hepatic arterial infusion chemotherapy in patients with advanced  
1009 hepatocellular carcinoma with portal vein tumor thrombosis. *Cancer Chemother Pharmacol*, 2018
- 1010 17. Guthoff I, Lotspeich E, Fester C, et al: Hepatic artery infusion using oxaliplatin in  
1011 combination with 5-fluorouracil, folinic acid and mitomycin C: oxaliplatin pharmacokinetics and  
1012 feasibility. *Anticancer Res* 23:5203-8, 2003
- 1013 18. Ensminger WD, Rosowsky A, Raso V, et al: A Clinical-Pharmacological Evaluation of Hepatic  
1014 Arterial Infusions of 5-Fluoro-2'-deoxyuridine and 5-Fluorouracil. *Cancer Research* 38:3784, 1978
- 1015 19. Ando E, Tanaka M, Yamashita F, et al: Hepatic arterial infusion chemotherapy for advanced  
1016 hepatocellular carcinoma with portal vein tumor thrombosis: analysis of 48 cases. *Cancer* 95:588-95,  
1017 2002
- 1018 20. Park JY, Ahn SH, Yoon YJ, et al: Repetitive short-course hepatic arterial infusion  
1019 chemotherapy with high-dose 5-fluorouracil and cisplatin in patients with advanced hepatocellular  
1020 carcinoma. *Cancer* 110:129-37, 2007
- 1021 21. Ikeda M, Shimizu S, Sato T, et al: Sorafenib plus hepatic arterial infusion chemotherapy with  
1022 cisplatin versus sorafenib for advanced hepatocellular carcinoma: randomized phase II trial. *Ann Oncol*  
1023 27:2090-2096, 2016
- 1024 22. Kudo M, Ueshima K, Yokosuka O, et al: Sorafenib plus low-dose cisplatin and fluorouracil  
1025 hepatic arterial infusion chemotherapy versus sorafenib alone in patients with advanced  
1026 hepatocellular carcinoma (SILIUS): a randomised, open label, phase 3 trial. *Lancet Gastroenterol*  
1027 *Hepatol*, 2018
- 1028 23. Bruno PM, Liu Y, Park GY, et al: A subset of platinum-containing chemotherapeutic agents  
1029 kills cells by inducing ribosome biogenesis stress. *Nat Med* 23:461-471, 2017
- 1030 24. Dzodic R, Gomez-Abuin G, Rougier P, et al: Pharmacokinetic advantage of intra-arterial  
1031 hepatic oxaliplatin administration: comparative results with cisplatin using a rabbit VX2 tumor model.  
1032 *Anticancer Drugs* 15:647-50, 2004
- 1033 25. Tesniere A, Schlemmer F, Boige V, et al: Immunogenic death of colon cancer cells treated  
1034 with oxaliplatin. *Oncogene* 29:482-91, 2010
- 1035 26. Apetoh L, Ghiringhelli F, Tesniere A, et al: Toll-like receptor 4-dependent contribution of the  
1036 immune system to anticancer chemotherapy and radiotherapy. *Nat Med* 13:1050-9, 2007
- 1037 27. Groot Koerkamp B, Sadot E, Kemeny NE, et al: Perioperative Hepatic Arterial Infusion Pump  
1038 Chemotherapy Is Associated With Longer Survival After Resection of Colorectal Liver Metastases: A  
1039 Propensity Score Analysis. *J Clin Oncol* 35:1938-1944, 2017
- 1040 28. Allard MA, Sebah M, Baillie G, et al: Comparison of complete pathologic response and  
1041 hepatic injuries between hepatic arterial infusion and systemic administration of oxaliplatin in patients  
1042 with colorectal liver metastases. *Ann Surg Oncol* 22:1925-32, 2015

- 1043 29. Qin S, Bai Y, Lim HY, et al: Randomized, multicenter, open-label study of oxaliplatin plus  
1044 fluorouracil/leucovorin versus doxorubicin as palliative chemotherapy in patients with advanced  
1045 hepatocellular carcinoma from Asia. *J Clin Oncol* 31:3501-8, 2013
- 1046 30. Lyu N, Kong Y, Mu L, et al: Hepatic arterial infusion of oxaliplatin plus fluorouracil/leucovorin  
1047 vs. sorafenib for advanced hepatocellular carcinoma. *J Hepatol* 69:60-69, 2018
- 1048 31. He MK, Zou RH, Li QJ, et al: Phase II Study of Sorafenib Combined with Concurrent Hepatic  
1049 Arterial Infusion of Oxaliplatin, 5-Fluorouracil and Leucovorin for Unresectable Hepatocellular  
1050 Carcinoma with Major Portal Vein Thrombosis. *Cardiovasc Intervent Radiol*, 2018
- 1051 32. Ma SQ, Cao BR, Zhang H, et al: The lack of Raf-1 kinase feedback regulation enhances  
1052 antiapoptosis in cancer cells. *Oncogene*, 2016
- 1053 33. Malofeeva EV, Domanitskaya N, Gudima M, et al: Modulation of the ATPase and transport  
1054 activities of broad-acting multidrug resistance factor ABCC10 (MRP7). *Cancer Res* 72:6457-67, 2012
- 1055 34. Lewin M, Fartoux L, Vignaud A, et al: The diffusion-weighted imaging perfusion fraction f is  
1056 a potential marker of sorafenib treatment in advanced hepatocellular carcinoma: a pilot study. *Eur*  
1057 *Radiol* 21:281-90, 2011
- 1058 35. Eisenhauer EA, Therasse P, Bogaerts J, et al: New response evaluation criteria in solid  
1059 tumours: revised RECIST guideline (version 1.1). *Eur J Cancer* 45:228-47, 2009
- 1060 36. Yount S, Cella D, Webster K, et al: Assessment of patient-reported clinical outcome in  
1061 pancreatic and other hepatobiliary cancers: the FACT Hepatobiliary Symptom Index. *J Pain Symptom*  
1062 *Manage* 24:32-44, 2002
- 1063 37. Tsuchida Y, Therasse P: Response evaluation criteria in solid tumors (RECIST): new guidelines.  
1064 *Med Pediatr Oncol* 37:1-3, 2001
- 1065 38. Lencioni R, Llovet JM: Modified RECIST (mRECIST) assessment for hepatocellular carcinoma.  
1066 *Semin Liver Dis* 30:52-60, 2010
- 1067 39. Kudo M, Matsui O, Izumi N, et al: JSH Consensus-Based Clinical Practice Guidelines for the  
1068 Management of Hepatocellular Carcinoma: 2014 Update by the Liver Cancer Study Group of Japan.  
1069 *Liver Cancer* 3:458-68, 2014

1070

1071 **Statistical analysis plan**

1072 The primary dataset for efficacy analyses is defined as all randomized patients  
1073 (intention-to-treat analysis). The safety analysis comprised all randomized patients  
1074 who received at least one dose of study treatment. There were no interim analyses in  
1075 this study.

1076 For baseline data, means and standard deviations were used for normally distributed  
1077 data, and medians and interquartile ranges were used for data that are not normally  
1078 distributed. The baseline characteristics were compared by Student's t-tests or  
1079 chi-square tests. Survival outcomes of overall survival, overall survival stratified by  
1080 portal vein invasion grade, progression-free survival, and intrahepatic  
1081 progression-free survival were calculated with the Kaplan-Meier method and  
1082 compared by log-rank tests. The response rates will be compared using Chi-square  
1083 test or Fisher's exact test, as appropriate. Any factors that were statistically significant  
1084 at P less than 0.10 in the univariate analysis were candidates for entry into a  
1085 multivariable Cox proportional hazards model. Hazard ratio and 95% confidence  
1086 interval will be calculated for the SoraHAIC group relative to the sorafenib group  
1087 using a Cox proportional-hazards model. All P values were two-sided, with P values  
1088 less than 0.05 considered significant. The statistical package used to perform analyses  
1089 was SAS, version 9.0 (SAS Institute, Cary, NC, USA).
