# Supplementary material
Source: PubMed Central journal article supplement (PMC6512278)
Supplement: jamaoncol-5-953-s003.pdf [file jamaoncol-5-953-s003.pdf]

## **Data Sharing Statement**

He. Sorafenib Plus Hepatic Arterial Infusion of Oxaliplatin, 5-Fluorouracil, and Leucovorin vs Sorafenib Alone for Hepatocellular Carcinoma With Portal Vein Invasion. *JAMA Oncol.* Published May 09, 2019. 10.1001/jamaoncol.2019.0250

### **Data**

**Data available:** No
